# Supplementary material
Source: PubMed Central journal article supplement (PMC3462927)
Supplement: supp_jc.2012-1384_12-1384.pdf [file supp_jc.2012-1384_12-1384.pdf]

## **Supplemental File: Text**

### **Methods: Hormone Assays**

#### ***Hormone assays and safety laboratory tests***

The safety laboratory tests were analyzed at the clinical laboratories at each of the study sites. NES concentrations in human serum samples were measured at the Population Council by a specific radioimmunoassay method previously described (27). The NES radioimmunoassay was validated and gave linear results over concentration range between 27 to 864 pmol/L (10 to 320 pg/ml). Intra-assay and inter-assay coefficient of variation varied from 3.4 to 13.9% and 9.3 to 13.5% respectively. All other hormone measurements were measured at the Endocrine and Metabolic Research Laboratory at Los Angeles Biomedical Research Center at Harbor-UCLA Medical Center using assays that have been fully validated and reported. Serum testosterone was measured by liquid chromatography tandem mass spectrometry (LC-MS/MS) (28, 29). Testosterone (>99% pure Sigma Aldrich, St. Louis, MO) was used as a calibration standard. 1, 2 deuterated (D<sub>2</sub>)-testosterone (>98% pure, Cambridge Isotope Laboratories, Inc., Andover, MA) was used as the internal standard for T measurements. Calibration standards and test samples were prepared for T using a liquid/liquid extraction twice with 2 mL ethyl acetate: hexanes (3:2 volume: volume). LC-MS/MS runs were performed with a Shimadzu HPLC system (Columbia, MD) attached to an Applied Biosystems API5000 LC-MS/MS (Foster City, CA) equipped with a Turbolon Spray source. The calibration standards showed a linear response from 1 ng/dl (0.35 nmol/liter) to 2000 ng/dL (69.3 nmol/liter) for T. The within and between run precision was less than 5 % and the recovery of samples spiked with the steroids was between 100 to 113% for T. The lower limit of quantification (LLOQ) for T was 2 ng/dl or 0.069 nmol/liter). The reference range for T in adult males is from 265 to 972 ng/dl (9.2 to 33.7 nmol/liter). Free testosterone (T) was measured by equilibrium dialysis using labeled T as described previously (30) and the adult male reference range is from 4.7-18.0 ng/dl (0.16 to

0.62 nmol/liter). Serum sex hormone binding globulin (SHBG) was measured by fluoroimmunoassays with reagents obtained from Delfia (Wallace, Gaithersburg, MD). The LOQ was determined to be 0.5 nmol/liter. The intra- and inter-assay coefficients were 2.3% and 6.1%, respectively. The adult male range for this assay is 10.8 to 46.6 nmol/liter. Serum LH and FSH levels were measured by ultra-sensitive and highly specific fluoroimmunoassays with reagents from Delfia (Pharmacia, Sweden). Both assays have a LLOQ of 0.2 IU/liter. The LH assay has a sensitivity of 0.2 IU/liter of 2nd IRP-hMG, the intraassay variation is 5.1% and inter-assay variation is 9.9%. The cross reactivity with TSH, FSH and free alpha subunit is < 1%. The sensitivity of the FSH assay is 0.2 IU/liter of 2nd IRP. The intra-assay variation is 5.8% and the cross reactivities in the LH, TSH and free alpha subunit are all < 1% (31-34).

**Supplemental Table 1. Percentage of men with sperm concentrations =0, ≤1 and ≤ 3 million/ml or serum gonadotropins suppressed to ≤0.5 or 1 IU/liter at 20-24 weeks**

|                             | Percentage of Men |               |               | Lower 95% Confidence Bound on Percentage of Men |          |           |
|-----------------------------|-------------------|---------------|---------------|-------------------------------------------------|----------|-----------|
|                             | 0 mg NES          | 8 mg NES      | 12 mg NES     | 0 mg NES                                        | 8 mg NES | 12 mg NES |
| <b>Sperm Concentration:</b> |                   |               |               |                                                 |          |           |
| ≤ 1 million/ml              | 5/22 = 22.7%      | 16/18 = 88.9% | 14/16 = 87.5% | 7.8%                                            | 65.3%    | 61.7%     |
| ≤ 3 million/ml              | 5/22 = 22.7%      | 16/18 = 88.9% | 14/16 = 87.5% | 7.8%                                            | 65.3%    | 61.7%     |
| 0                           | 5/22 = 22.7%      | 14/18 = 77.8% | 11/16 = 68.8% | 9.4%                                            | 52.4%    | 41.3%     |
| <b>Gonadotropins:</b>       |                   |               |               |                                                 |          |           |
| LH and FSH < 0.5 IU/liter   | 4/22 = 18.2%      | 11/17 = 64.7% | 11/15 = 73.3% | 5.2%                                            | 38.3%    | 44.9%     |
| LH and FSH < 1.0 IU/liter   | 7/22 = 31.8%      | 13/17 = 76.5% | 12/15 = 80.0% | 13.9%                                           | 50.1%    | 51.9%     |

P-values:

|                           | <u>0 vs. 8 mg Nes</u> | <u>0 vs. 12 mg Nes</u> | <u>8 vs. 12 mg Nes</u> |
|---------------------------|-----------------------|------------------------|------------------------|
| Concentration ≤ 1         | <0.0001               | 0.0002                 | >0.99                  |
| Concentration ≤ 3         | <0.0001               | 0.0002                 | >0.99                  |
| Concentration = 0         | 0.001                 | 0.008                  | 0.70                   |
| LH and FSH < 0.5 IU/liter | 0.007                 | 0.002                  | 0.71                   |
| LH and FSH < 1.0 IU/liter | 0.01                  | 0.01                   | >0.99                  |

**Supplemental Table 2: Parameters and Hormone Concentrations at 24 weeks  
and Percent Change of Semen (Median, 95% CI in parenthesis)**

\* among subjects with detected sperm.

|                                                         | Week 24 Median<br>( 95% CI ) |                     |                      | Median % Change From Week 0<br>to Week 24<br>( 95% CI ) |                            |                            |
|---------------------------------------------------------|------------------------------|---------------------|----------------------|---------------------------------------------------------|----------------------------|----------------------------|
|                                                         | 0 mg NES<br>(n=22)           | 8 mg NES<br>(n=18)  | 12 mg NES<br>(n=16)  | 0 mg<br>NES                                             | 8 mg<br>NES                | 12 mg<br>NES               |
| <b>Total Sperm<br/>(X10<sup>6</sup>/<br/>ejaculate)</b> | 53.5<br>(22.2,116.7)         | 0.0<br>(0.0,0.0)    | 0.0<br>(0.0,0.2)     | -59.8<br>(-82.4,<br>-23.8)                              | -100<br>(-100,<br>-100)    | -100<br>(-100,<br>-99.7)   |
| <b>Sperm<br/>Concentration<br/>(X10<sup>6</sup>/ml)</b> | 20.7<br>(15.8,44.1)          | 0.0<br>(0.0,0.0)    | 0.0<br>(0.0,0.1)     | -50.1<br>(-67.1,<br>7.3)                                | -100<br>(-100,<br>-100)    | -100<br>(-100,<br>-99.9)   |
| <b>% Motile<br/>Sperm*</b>                              | 64.0<br>(58.0,68.0)          | 47.0<br>(0.0,100.0) | 41.0<br>(23.0,100.0) | 0.1<br>(-6.0,<br>11.5)                                  | -26.6<br>(-100,<br>42.9)   | 17.1<br>(-61.7,<br>220)    |
| <b>% Sperm with<br/>Normal<br/>Morphology*</b>          | 11.0<br>(10.0,15.0)          | 10.0<br>(2.0,12.0)  | 10.0<br>(0.0,11.0)   | -6.3<br>(-28.6,<br>14.3)                                | -47.4<br>(-75.0,<br>-36.8) | -35.2<br>(-100.0,<br>-8.3) |
|                                                         |                              |                     |                      |                                                         |                            |                            |
| <b>Testosterone<br/>(nmol/liter)</b>                    | 26.2<br>(19.2,37.8)          | 18.5<br>(10.7,32.7) | 26.4<br>(18.7,40.6)  | 20.4<br>(-4.6,<br>135.6)                                | 3.2<br>(-34.4,<br>108.3)   | 24.8<br>(-13.7,<br>201.1)  |
| <b>Free<br/>Testosterone<br/>(nmol/liter)</b>           | 0.36<br>(0.32,0.55)          | 0.32<br>(0.16,0.61) | 0.33<br>(0.26,0.94)  | 16.8<br>(-15.92,<br>210.3)                              | 25.6<br>(-29.2,<br>167.7)  | 33.5<br>(14.0,<br>306.8)   |
| <b>SHBG<br/>(nmol/liter)</b>                            | 37.4<br>(24.7,43.9)          | 29.7<br>(19.5,45.8) | 34.2<br>(26.1,42.4)  | -11.2<br>(-18.4,<br>1.6)                                | -22.7<br>(-29.5,<br>8.8)   | -6.0<br>(-28.8,<br>3.9)    |
| <b>LH<br/>(IU/liter)</b>                                | 3.21<br>(0.74,3.99)          | 0.12<br>(0.12,0.19) | 0.12<br>(0.12,0.17)  | -23.5<br>(-77.2,<br>35.1)                               | -95.9<br>(-97.6,<br>-92.9) | -96.8<br>(-97.6,<br>-93.8) |
| <b>FSH<br/>(IU/liter)</b>                               | 1.99<br>(1.15,4.26)          | 0.12<br>(0.10,0.98) | 0.22<br>(0.10,0.74)  | -16.5<br>(-75.3,<br>-1.5)                               | -94.3<br>(-98.1,<br>-68.6) | -96.5<br>(-97.6,<br>-68.8) |
| <b>NES<br/>(pmol/liter)</b>                             |                              | 372<br>(162,653)    | 632<br>(367,885)     |                                                         |                            |                            |

**Supplemental Table 2 (footnote): Efficacy Changes at Week 24 P-values**

| Week 24:            | 0 vs. 8 mg NES | 0 vs. 12 mg NES | 8 vs. 12 mg NES |
|---------------------|----------------|-----------------|-----------------|
| Total Sperm         | 0.0001         | 0.001           | 0.53            |
| Sperm Concentration | <0.0001        | 0.002           | 0.51            |
| % Motile Sperm      | 0.30           | 0.047           | 0.90            |
| % Normal Sperm      | 0.26           | 0.20            | 0.72            |
| Testosterone        | 0.12           | 0.87            | 0.16            |
| Free Testosterone   | 0.32           | 0.72            | 0.36            |
| SHBG                | 0.58           | 0.87            | 0.62            |
| LH                  | 0.001          | 0.0006          | >0.99           |
| FSH                 | 0.011          | 0.022           | 0.46            |
| Nestorone           |                |                 | 0.16            |
| <br>                |                |                 |                 |
| % Changes:          | 0 vs. 8 mg NES | 0 vs. 12 mg NES | 8 vs. 12 mg NES |
| Total Sperm         | <0.0001        | 0.002           | 0.48            |
| Sperm Concentration | <0.0001        | 0.002           | 0.45            |
| % Motile Sperm      | 0.22           | 0.80            | 0.33            |
| % Normal Sperm      | 0.007          | 0.06            | 0.48            |
| Testosterone        | 0.40           | 0.77            | 0.47            |
| Free Testosterone   | 0.81           | 0.45            | 0.58            |
| SHBG                | 0.28           | 0.82            | 0.66            |
| LH                  | 0.001          | 0.0003          | 0.28            |
| FSH                 | 0.004          | 0.004           | 0.84            |

**Supplemental Table 2a: Percent Change from Week 0 to Final Evaluation for Sperm Count and Concentration**

|                                                         | Final Evaluation Median<br>( 95% CI ) |                        |                      | Median % Change From Week 0<br>to Final Evaluation<br>( 95% CI ) |                           |                           |
|---------------------------------------------------------|---------------------------------------|------------------------|----------------------|------------------------------------------------------------------|---------------------------|---------------------------|
|                                                         | 0 mg NES<br>(n=22)                    | 8 mg NES<br>(n=18)     | 12 mg NES<br>(n=16)  | 0 mg<br>NES                                                      | 8 mg<br>NES               | 12 mg<br>NES              |
| <b>Total Sperm<br/>(X10<sup>6</sup>/<br/>ejaculate)</b> | 149.9<br>(97.2,196.0)                 | 150.8<br>(101.3,240.7) | 86.5<br>(54.6,149.6) | -8.9<br>(-41.2,<br>28.7)                                         | -0.1<br>(-36.2,<br>52.4)  | -1.6<br>(-50.0,<br>41.6)  |
| <b>Sperm<br/>Concentration<br/>(X10<sup>6</sup>/ml)</b> | 41.5<br>(29.3,51.4)                   | 60.0<br>(30.5,89.0)    | 39.5<br>(24.5,68.0)  | 0.75<br>(-24.2,<br>29.2)                                         | -6.91<br>(-23.9,<br>31.1) | 19.54<br>(-26.9,<br>55.1) |

Note: Final evaluation is the value at the end of the trial for each subject for a given parameter.

**P-values**

|                               |                |                 |                 |
|-------------------------------|----------------|-----------------|-----------------|
| Final Evaluation:             | 0 vs. 8 mg NES | 0 vs. 12 mg NES | 8 vs. 12 mg NES |
| Total Sperm                   | 0.935          | 0.092           | 0.073           |
| Sperm Concentration           | 0.704          | 0.391           | 0.458           |
| <br>                          |                |                 |                 |
| % Change to Final Evaluation: | 0 vs. 8 mg NES | 0 vs. 12 mg NES | 8 vs. 12 mg NES |
| Total Sperm                   | 0.532          | 0.768           | 0.629           |
| Sperm Concentration           | 0.935          | 0.574           | 0.558           |

**Supplemental Table 2b: Sperm Concentration Time to Recovery**

|                                                                    | Sperm Concentration Median Time to Recovery<br>( 95% CI ) |                    |                     |
|--------------------------------------------------------------------|-----------------------------------------------------------|--------------------|---------------------|
|                                                                    | 0 mg NES<br>(n=22)                                        | 8 mg NES<br>(n=18) | 12 mg NES<br>(n=16) |
| <b>Sperm<br/>Concentration<br/>Time to<br/>Recovery<br/>(days)</b> | 1.0<br>(0,6)                                              | 114.5<br>(105,141) | 115.5<br>(67,122)   |

Note: Sperm concentration time to recovery is defined as the time from date of last dose to the first sperm concentration  $\geq$  15 million/ml.

**Supplemental Table 3. Changes in Psychosexual Questionnaire Score During Treatment**

|                                  | Week 24 Minus Week 0 Changes (Median, 95% CI in parenthesis) |                         |                         |                         |
|----------------------------------|--------------------------------------------------------------|-------------------------|-------------------------|-------------------------|
|                                  | All Subjects                                                 | 0 mg NES                | 8 mg NES                | 12 mg NES               |
| Sexual Desire                    | 0.29<br>(-0.06, 0.86)                                        | 0.29<br>(-0.03, 1.27)   | 0.22<br>(-0.17, 1.21)   | 0.43<br>(-1.15, 1.15)   |
| Sexual Enjoyment with Partner    | 0.51<br>(-0.47, 1.59)                                        | 0.07<br>Not Estimable   | -0.245<br>(-2.27, 0.22) | 1.58<br>Not Estimable   |
| Sexual Enjoyment without partner | -0.10<br>(-0.68, 0.29)                                       | -0.1<br>(-0.57, 0.79)   | -0.57<br>(-3.43, 2.75)  | 0.00<br>(-0.71, 0.90)   |
| Sexual Activity                  | -0.01<br>(-0.03, 0.07)                                       | -0.01<br>(-0.06, 0.07)  | 0.045<br>(-0.03, 0.13)  | -0.05<br>(-0.12, 0.11)  |
| Satisfaction with erection       | 0.11<br>(0.04, 0.78)                                         | -0.035<br>(-0.27, 0.95) | 0.40<br>(-0.02, 1.15)   | 0.20<br>(-0.4, 1.92)    |
| Percent erection                 | 2.00<br>(-0.24, 8.57)                                        | 2.17<br>(-4.15, 8.84)   | 4.05<br>(-1.86, 12.74)  | 0.00<br>(-34.67, 32.86) |
| Positive mood scores             | -0.18<br>(-0.42, 0.18)                                       | -0.18<br>(-0.52, 0.56)  | 0.25<br>(-0.2, 0.52)    | -0.48<br>(-1.55, 0.06)  |
| Negative mood scores             | 0.11<br>(-0.1, 0.46)                                         | 0.31<br>(-0.17, 0.69)   | -0.17<br>(-0.82, 0.4)   | 0.2<br>(-0.01, 1.08)    |

| P-values:                        | 0 vs. 8 mg | 0 vs. 12 mg | 8 vs. 12 mg |
|----------------------------------|------------|-------------|-------------|
| Sexual Desire                    | 0.69       | 0.79        | 0.75        |
| Sexual Enjoyment with Partner    | 0.80       | 0.08        | 0.29        |
| Sexual Enjoyment without partner | 0.21       | 0.93        | 0.21        |
| Sexual Activity                  | 0.44       | 0.73        | 0.44        |
| Satisfaction with erection       | 0.23       | 0.26        | 0.48        |
| Percent erection                 | 0.47       | 0.86        | 0.80        |
| Positive mood scores             | 0.27       | 0.17        | 0.048       |
| Negative mood scores             | 0.08       | 0.54        | 0.037       |

**Supplemental Table 4. Median levels of Weight, Blood Pressure, blood Counts and Clinical Chemistry and IPPS Scores at 24 weeks**

|                                  | Week 24 (Median, 95% CI in parenthesis) |                     |                     |                     | p-value |          |          |
|----------------------------------|-----------------------------------------|---------------------|---------------------|---------------------|---------|----------|----------|
|                                  | All Subjects                            | 0 mg NES            | 8 mg NES            | 12 mg NES           | 0 vs. 8 | 0 vs. 12 | 8 vs. 12 |
| <b>Weight (kg)</b>               | 82.6<br>(78.9,84.8)                     | 79.9<br>(73.5,83.9) | 81.2<br>(74.9,84.8) | 86.4<br>(83.9,91.6) | 0.81    | 0.02     | 0.02     |
| <b>SBP (mm/Hg)</b>               | 122<br>(118,128)                        | 122<br>(117,132)    | 121<br>(115,131)    | 123<br>(117,130)    | 0.85    | 0.86     | 0.87     |
| <b>DBP (mm/Hg)</b>               | 69<br>(66,71)                           | 69<br>(65,73)       | 69<br>(65,74)       | 69<br>(66,71)       | 0.85    | 0.76     | 0.75     |
| <b>Total Cholesterol (mg/dl)</b> | 166<br>(162,182)                        | 182<br>(153,208)    | 164<br>(157,175)    | 166<br>(147,187)    | 0.35    | 0.47     | 0.89     |
| <b>HDL (mg/dl)</b>               | 40<br>(38,44)                           | 42<br>(39,45)       | 42<br>(36,47)       | 38<br>(34,43)       | 0.99    | 0.16     | 0.28     |
| <b>LDL (mg/dl)</b>               | 106<br>(95,113)                         | 109<br>(89,136)     | 1030<br>(92,115)    | 106<br>(89,115)     | 0.63    | 0.95     | 0.81     |
| <b>HDL/LDL (ratio)</b>           | 0.39<br>(0.34,0.44)                     | 0.41<br>(0.32,0.47) | 0.41<br>(0.32,0.50) | 0.36<br>(0.31,0.44) | 0.76    | 0.49     | 0.30     |
| <b>Triglycerides (mg/dl)</b>     | 86<br>(59,103)                          | 107<br>(54,125)     | 88<br>(53,122)      | 69<br>(49,98)       | 0.60    | 0.41     | 0.54     |
| <b>Glucose (mg/dl)</b>           | 90.0<br>(88, 94)                        | 90.0<br>(87, 93)    | 92.5<br>(84, 94)    | 90.0<br>(85, 94)    | 0.89    | 0.88     | 0.88     |
| <b>ALP (U/liter)</b>             | 60<br>(56,66)                           | 60<br>(54,73)       | 63<br>(51,67)       | 60<br>(49,73)       | 0.80    | 0.95     | 0.87     |
| <b>ALT (U/liter)</b>             | 25<br>(22,30)                           | 25<br>(18,30)       | 30<br>(21,38)       | 22<br>(18,38)       | 0.13    | 0.81     | 0.42     |
| <b>AST (U/liter)</b>             | 25<br>(22,25)                           | 24<br>(21,27)       | 25<br>(22,28)       | 25<br>(18,27)       | 0.60    | 0.71     | 0.56     |
| <b>PSA (ng/ml)</b>               | 0.70<br>(0.59,0.79)                     | 0.70<br>(0.50,0.80) | 0.61<br>(0.49,1.00) | 0.76<br>(0.52,1.20) | 0.76    | 0.28     | 0.31     |
| <b>Hemoglobin (g/dl)</b>         | 15.4<br>(15.1,15.9)                     | 15.4<br>(15.0,15.9) | 15.5<br>(15.0,16.0) | 15.4<br>(14.7,16.1) | 0.75    | 0.99     | 0.69     |
| <b>Hematocrit (%)</b>            | 44.7<br>(44.0,45.1)                     | 44.8<br>(42.8,45.9) | 44.9<br>(44.0,46.5) | 44.5<br>(43.8,46.5) | 0.38    | 0.75     | 0.44     |
| <b>IPSS Score</b>                | 3.0<br>(2.0,3.0)                        | 2.0<br>(0.0,3.0)    | 4.0<br>(3.0,7.0)    | 3.0<br>(0.0,4.0)    | 0.03    | 0.44     | 0.27     |



**Supplemental Table 5: Changes in Weight, Blood Pressure, blood Counts and Clinical Chemistry and IPPS Scores at 24 weeks**

|                                  | Week 24 Minus Week 0 Changes (Median, 95% CI in parenthesis) |                         |                          |                          | p-value |          |          |
|----------------------------------|--------------------------------------------------------------|-------------------------|--------------------------|--------------------------|---------|----------|----------|
|                                  | All Subjects                                                 | 0 mg NES                | 8 mg NES                 | 12 mg NES                | 0 vs. 8 | 0 vs. 12 | 8 vs. 12 |
| <b>Weight (Kg)</b>               | 2.5<br>(1.8, 3.9)                                            | 1.1<br>(-0.45, 2.5)     | 5.2<br>(2.5, 6.1)        | 2.5<br>(1.6, 4.8)        | 0.004   | 0.057    | 0.307    |
| <b>SBP (mmHg)</b>                | 7<br>(5, 10)                                                 | 7<br>(3, 12)            | 8<br>(3.5, 14)           | 4.5<br>(1, 12)           | 0.76    | 0.49     | 0.37     |
| <b>DBP (mmHg)</b>                | 0.5<br>(-2.5, 3.0)                                           | -0.5<br>(-4.5, 5)       | -3.0<br>(-7, 4.5)        | 3.5<br>(-1.5, 7)         | 0.65    | 0.34     | 0.17     |
| <b>Total Cholesterol (mg/dl)</b> | 3<br>(-6.5, 4)                                               | 1.5<br>(-7.5, 7)        | 0.5<br>(-19.5, 7.5)      | 4<br>(-7.5, 8.5)         | 0.51    | 0.99     | 0.46     |
| <b>HDL (mg/dl)</b>               | -1<br>(-2.5, 0.5)                                            | 2<br>(0.5, 5.5)         | -3.5<br>(-5.5, 0)        | -4<br>(-6.5, -1.5)       | 0.002   | <0.0001  | 0.53     |
| <b>LDL (mg/dl)</b>               | -2<br>(-5.5, 3.5)                                            | -4<br>(-9, 3)           | 3.5<br>(-14.5, 7)        | 4<br>(-3.5, 10.5)        | 0.94    | 0.13     | 0.39     |
| <b>HDL/LDL (ratio)</b>           | -0.00<br>(-0.024, 0.018)                                     | 0.03<br>(-0.007, 0.078) | -0.01<br>(-0.052, 0.038) | -0.04<br>(-0.092, 0.021) | 0.044   | 0.0001   | 0.09     |
| <b>Triglycerides (mg/dl)</b>     | 0<br>(-8, 11.5)                                              | 2<br>(-18, 13)          | -0.5<br>(-11.5, 28)      | 8<br>(-22.5, 27)         | 0.66    | 0.83     | 0.81     |
| <b>Glucose (mg/dl)</b>           | 2.0<br>-1.0 4.0                                              | 0.5<br>-4.0 4.5         | 2.0<br>-6.0 3.5          | 6.0<br>3.0 9.0           | 0.690   | 0.0561   | 0.0180   |
| <b>ALP (U/liter)</b>             | -3<br>(-5.5, -0.5)                                           | 3<br>(-1, 5.5)          | -5<br>(-10.5, -1)        | -6<br>(-14.5, -3.5)      | 0.004   | 0.0004   | 0.30     |
| <b>ALT (U/liter)</b>             | 2<br>(0, 5)                                                  | 0<br>(-4.5, 3.5)        | 8<br>(4, 10.5)           | -1<br>(-5.5, 7.5)        | 0.008   | 0.97     | 0.047    |
| <b>AST (U/liter)</b>             | 0<br>(-1.5, 2.5)                                             | 0<br>(-2.5, 3.5)        | 1<br>(-1.5, 5)           | -1<br>(-8, 3)            | 0.54    | 0.60     | 0.29     |
| <b>PSA (ng/ml)</b>               | 0.015<br>(0.005, 0.10)                                       | 0.00<br>(-0.04, 0.085)  | 0.03<br>(0.005, 0.25)    | 0.6<br>(0.015, 0.15)     | 0.27    | 0.30     | 0.73     |
| <b>Hemoglobin (g/dl)</b>         | 0.3<br>(0.2, 0.55)                                           | 0.2<br>(0.0, 0.5)       | 0.3<br>(0.1, 0.7)        | 0.4<br>(0.1, 0.85)       | 0.80    | 0.57     | 0.99     |
| <b>Hematocrit (%)</b>            | 1.0<br>(0.9, 1.65)                                           | 1.0<br>(0.2, 1.3)       | 0.9<br>(0.09, 2.95)      | 1.45<br>(0.5, 2.5)       | 0.96    | 0.52     | 0.86     |
| <b>IPSS Score</b>                | 0.0<br>(0.0, 2.0)                                            | 0.0<br>(-1.5, 3.5)      | 1.0<br>(1.0, 3.0)        | 1.0<br>(-0.5, 3.5)       | 0.08    | 0.23     | 0.64     |
